# Supplementary material for: Younger Age and Parenchyma-Sparing Surgery Positively Affected Long-Term Health-Related Quality of Life after Surgery for Pancreatic Neuroendocrine Neoplasms
Source: MDPI journal article supplement (doi:10.3390/jcm12206529), 2023-10-14
Supplement: s1 [file s1]

**Table S1.** Distribution of EORTC scores according to the variables of interest. Data are median [I quartile-III quartile].

|                        | Functional Scales   |                      |                     | Symptomatic Scales      |                     |                     |
|------------------------|---------------------|----------------------|---------------------|-------------------------|---------------------|---------------------|
|                        | Global QoL          | Physical Functioning | Social Functioning  | Disease-Related Worries | Pain                | Upper-GI Symptoms   |
|                        | Median (IQR)        | Median (IQR)         | Median (IQR)        | Median (IQR)            | Median (IQR)        | Median (IQR)        |
| <b>Gender</b>          |                     |                      |                     |                         |                     |                     |
| Male                   | 0.83<br>(0.67-1.00) | 1.00<br>(0.94-1.00)  | 0.94<br>(0.80-1.00) | 0.25<br>(0.08-0.33)     | 0.05<br>(0.00-0.10) | 0.03<br>(0.00-0.09) |
| Female                 | 0.75<br>(0.58-0.88) | 0.87<br>(0.72-0.94)  | 0.89<br>(0.78-0.94) | 0.27<br>(0.16-0.40)     | 0.10<br>(0.05-0.23) | 0.06<br>(0.00-0.09) |
| <b>Age</b>             |                     |                      |                     |                         |                     |                     |
| >= 65 y                | 0.67<br>(0.50-0.83) | 0.83<br>(0.67-0.94)  | 0.89<br>(0.76-0.94) | 0.27<br>(0.17-0.40)     | 0.10<br>(0.05-0.24) | 0.06<br>(0.03-0.15) |
| < 65 y                 | 0.83<br>(0.67-1.00) | 0.94<br>(0.89-1.00)  | 0.89<br>(0.83-0.94) | 0.25<br>(0.08-0.33)     | 0.05<br>(0.00-0.14) | 0.03<br>(0.00-0.08) |
| <b>Comorbidities</b>   |                     |                      |                     |                         |                     |                     |
| No                     | 0.67<br>(0.67-1.00) | 1.00<br>(0.94-1.00)  | 0.89<br>(0.83-0.94) | 0.27<br>(0.13-0.33)     | 0.05<br>(0.00-0.10) | 0.06<br>(0.03-0.09) |
| Single                 | 0.83<br>(0.73-1.00) | 0.94<br>(0.83-1.00)  | 0.94<br>(0.83-0.97) | 0.17<br>(0.07-0.29)     | 0.08<br>(0.04-0.15) | 0.03<br>(0.00-0.06) |
| Multiple               | 0.83<br>(0.58-0.92) | 0.89<br>(0.72-1.00)  | 0.89<br>(0.72-0.94) | 0.27<br>(0.17-0.40)     | 0.10<br>(0.00-0.24) | 0.05<br>(0.00-0.12) |
| <b>Type of NEN</b>     |                     |                      |                     |                         |                     |                     |
| NF                     | 0.83<br>(0.58-1.00) | 0.94<br>(0.75-1.00)  | 0.89<br>(0.78-0.94) | 0.27<br>(0.17-0.40)     | 0.05<br>(0.00-0.19) | 0.03<br>(0.00-0.09) |
| F                      | 0.83<br>(0.67-1.00) | 0.94<br>(0.78-1.00)  | 0.89<br>(0.82-0.94) | 0.25<br>(0.08-0.33)     | 0.10<br>(0.05-0.19) | 0.06<br>(0.00-0.09) |
| <b>Tumor grade</b>     |                     |                      |                     |                         |                     |                     |
| G2                     | 0.83<br>(0.79-1.00) | 0.94<br>(0.88-1.00)  | 0.91<br>(0.88-0.94) | 0.20<br>(0.13-0.37)     | 0.05<br>(0.00-0.10) | 0.03<br>(0.00-0.06) |
| G1                     | 0.75<br>(0.58-0.92) | 0.94<br>(0.78-1.00)  | 0.89<br>(0.78-0.94) | 0.27<br>(0.13-0.33)     | 0.10<br>(0.00-0.19) | 0.06<br>(0.00-0.09) |
| <b>Type of surgery</b> |                     |                      |                     |                         |                     |                     |
| Limited                | 0.83<br>(0.67-1.00) | 0.94<br>(0.82-1.00)  | 0.89<br>(0.83-1.00) | 0.20<br>(0.07-0.27)     | 0.10<br>(0.00-0.19) | 0.03<br>(0.00-0.07) |
| Standard               | 0.83<br>(0.58-0.92) | 0.94<br>(0.67-1.00)  | 0.89<br>(0.72-0.94) | 0.27<br>(0.17-0.40)     | 0.08<br>(0.00-0.19) | 0.06<br>(0.00-0.12) |

**Legend.** QoL, quality of life. GI, gastrointestinal. IQR, interquartile range. NEN, neuroendocrine neoplasm. NF, nonfunctioning. F, functioning.
